# Supplementary material for: Successful Control of an Outbreak by Phenotypically Identified Extended-Spectrum Beta-Lactamase–Producing Klebsiella pneumoniae in a Neonatal Intensive Care Unit
Source: MDPI journal article supplement (doi:10.3390/antibiotics11111649), 2022-11-18
Supplement: s1 [file s1]

*Supplementary Table S1. Clinical characteristics of patients infected or colonized with ESBL-KP during the outbreak*

| <i>Case</i> | <i>Sex</i> | <i>Main morbidities</i>                                                                                    | <i>BW(g)</i> | <i>Room</i> | <i>Invasive procedures</i>                                             | <i>Infection type</i> | <i>Positive culture sample (date)</i>            | <i>Antibiotic regimen</i>                                        | <i>Outcome</i>                       |
|-------------|------------|------------------------------------------------------------------------------------------------------------|--------------|-------------|------------------------------------------------------------------------|-----------------------|--------------------------------------------------|------------------------------------------------------------------|--------------------------------------|
| 1           | F          | Ciliopathy - Joubert syndrome like<br>Bone Dysplasia<br>Respiratory failure                                | 3430         | T2          | UVC<br>CVC mechanical ventilation<br>LTS                               | VAP                   | mini-BAL (02/02)<br>Pharyngeal swab (05/02)      | Meropenem + vancomycin, then meropenem                           | Cured, later dead (for other causes) |
| 2           | M          | Extremely preterm (24 gws)<br>RDS<br>BPD                                                                   | 700          | T1          | UVC<br>UAC<br>ECC<br>non-invasive ventilation                          | LOS (CLABSI)          | Blood culture (02/02)<br>Pharyngeal swab (05/02) | Vancomycin + amikacin, then amikacin + meropenem, then meropenem | Cured, discharged                    |
| 3           | M          | Moderate preterm (31+4 gws)<br>IUGR<br>Suspected syndrome (esophageal atresia, CHD)<br>RDS<br>Pneumothorax | 1200         | T1          | UVC<br>UAC<br>ECC<br>mechanical ventilation<br>pleural drainage<br>LTS | LOS (CLABSI)          | Blood culture (03/02)<br>Pharyngeal swab (05/02) | Vancomycin + meropenem, then meropenem                           | Cured, later dead (for other causes) |

|   |   |                                                                                                                                                                                                                                                          |      |    |                                                                                   |                                    |                                                                                     |                                              |                              |
|---|---|----------------------------------------------------------------------------------------------------------------------------------------------------------------------------------------------------------------------------------------------------------|------|----|-----------------------------------------------------------------------------------|------------------------------------|-------------------------------------------------------------------------------------|----------------------------------------------|------------------------------|
| 4 | F | Extremely preterm (23+1 gws)<br><br>IUGR<br><br>RDS<br><br>Patent ductus arteriosus<br><br>IVH II                                                                                                                                                        | 400  | T1 | UVC<br><br>UAC<br><br>ECC<br><br>mechanical<br>ventilation<br><br>Cardiac surgery | Colonized,<br>then septic<br>shock | Cutaneous swab (03/02),<br><br>Pharyngeal swab (05/02)<br><br>Blood culture (09/02) | Vancomycin +<br>meropenem, then<br>meropenem | Dead                         |
| 5 | M | Extremely preterm (24 gws)<br><br>Severe RDS<br><br>Pulmonary hypertension<br><br>Cardiac dysfunction with<br>systemic hypotension<br><br>Patent ductus arteriosus<br><br>IVH III and periventricular<br>hemorrhagic infarction<br><br>Bowel perforation | 730  | T3 | UVC<br><br>ECC<br><br>mechanical<br>ventilation                                   | Colonized,<br>then LOS<br>(CLABSI) | Pharyngeal swab (06/02)<br><br>Blood culture (07/02)                                | Vancomycin+<br>meropenem                     | Dead (palliative<br>care)    |
| 6 | F | Late preterm (36+5 gws)<br><br>IUGR<br><br>HIE                                                                                                                                                                                                           | 1925 | T1 | UVC<br><br>UAC<br><br>non-invasive<br>ventilation                                 | Colonized                          | Pharyngeal swab (05/02)                                                             | Not treated                                  | Moved to another<br>hospital |

|    |   |                                                                                       |      |                                       |                                                                              |           |                                                             |             |                              |
|----|---|---------------------------------------------------------------------------------------|------|---------------------------------------|------------------------------------------------------------------------------|-----------|-------------------------------------------------------------|-------------|------------------------------|
| 7  | M | Moderate preterm (31+4 gws)<br>RDS                                                    | 1620 | T3                                    | UVC<br>non-invasive<br>ventilation                                           | Colonized | Rectal swab<br>(08/02, on admission in<br>another hospital) | Not treated | Moved to another<br>hospital |
| 8  | F | CHD                                                                                   | 3800 | T2                                    | UVC<br>CVC                                                                   | Colonized | Rectal swab<br>(09/02)                                      | Not treated | Moved to another<br>ward     |
| 9  | F | Late preterm (35+1 gws)<br>IUGR<br>Down syndrome<br>CHD<br>Respiratory failure<br>NEC | 1660 | Sub-<br>intensive<br>ward –<br>room 2 | CVCs<br>Mechanical<br>ventilation<br>Abdominal<br>surgery<br>Cardiac surgery | Colonized | Rectal and pharyngeal<br>swab (09/02)                       | Not treated | Moved to another<br>ward     |
| 10 | M | Moderate preterm (31+4 gws)<br>RDS                                                    | 1450 | I                                     | UVC                                                                          | Colonized | Rectal swab<br>(09/02)                                      | Not treated | Discharged                   |
| 11 | F | Moderate preterm (32 gws)<br>Alagille syndrome<br>CHD<br>Pleural effusion             | 1865 | Sub-<br>intensive<br>ward –<br>room 4 | UVC<br>ECC<br>Mechanical<br>ventilation                                      | Colonized | Rectal and pharyngeal<br>swab (09/02)                       | Not treated | Moved to another<br>hospital |

|    |   |                                                          |      |                                       |                                    |           |                        |             |            |
|----|---|----------------------------------------------------------|------|---------------------------------------|------------------------------------|-----------|------------------------|-------------|------------|
| 12 | F | Extremely preterm (27+4)<br>RDS                          | 1160 | Sub-<br>intensive<br>ward –<br>room 2 | UVC<br>non-invasive<br>ventilation | Colonized | Rectal swab<br>(09/02) | Not treated | Discharged |
| 13 | M | Moderate preterm (30)<br>RDS<br>Patent ductus arteriosus | 1600 | Sub-<br>intensive<br>ward –<br>room 4 | UVC<br>non-invasive<br>ventilation | Colonized | Rectal swab<br>(09/02) | Not treated | Discharged |

Legend: BW: birth weight; F: female; M: male; gws: gestational weeks; RDS: respiratory distress syndrome; BPD: bronchopulmonary dysplasia; IUGR: intrauterine growth restriction; CHD: congenital heart disease; NEC: necrotizing enterocolitis; IVH: intraventricular hemorrhage HIE: hypoxic-ischemic encephalopathy; T1-3: NICU six-bed rooms; I: isolation room; UVC umbilical venous catheter; UAC: umbilical arterial catheter; CVC: central venous catheter; ECC: epicutaneous-caval catheter; LTS: laryngotracheoscopy; VAP: ventilator-associated pneumonia; LOS: late-onset sepsis, CLABSI: central-line-associated bloodstream infection; BAL: bronchoalveolar lavage.

|                                                                                                                                                                                                                                                                        |
|------------------------------------------------------------------------------------------------------------------------------------------------------------------------------------------------------------------------------------------------------------------------|
| <ul style="list-style-type: none"> <li>• A case of systemic infection by ESBL-PE, CPE or CRE</li> </ul>                                                                                                                                                                |
| <ul style="list-style-type: none"> <li>• A case of systemic infection by <i>Pseudomonas Aeruginosa</i></li> </ul>                                                                                                                                                      |
| <ul style="list-style-type: none"> <li>• A case of systemic infection by an unusual gram-negative bacteria (e.g. <i>Citrobacter</i> spp, <i>Serratia</i> spp, <i>Acinetobacter baumannii</i>, <i>Burkholderia</i> spp, <i>Stenotrophomonas maltophilia</i>)</li> </ul> |
| <ul style="list-style-type: none"> <li>• 2 or more isolates of the same microorganism (except CoNS) from a sterile site in the last 30 days</li> </ul>                                                                                                                 |
| <ul style="list-style-type: none"> <li>• 2 or more isolates of the same MDRO or of the same unusual gram-negative from a non-sterile site in the last 30 days</li> </ul>                                                                                               |

*Supplementary Table S2: Criteria for definition of an epidemic event or a potential epidemic event*

Legend: ESBL-PE: extended-spectrum beta-lactamase-producing *Enterobacterales*; CPE: carbapenemase-producing *Enterobacterales*; CPE: carbapenem-resistant *Enterobacterales*; CoNS: Coagulase-negative *staphylococci*; MDRO: multidrug-resistant organism
